# Supplementary material
Source: PubMed Central journal article supplement (PMC2111399)

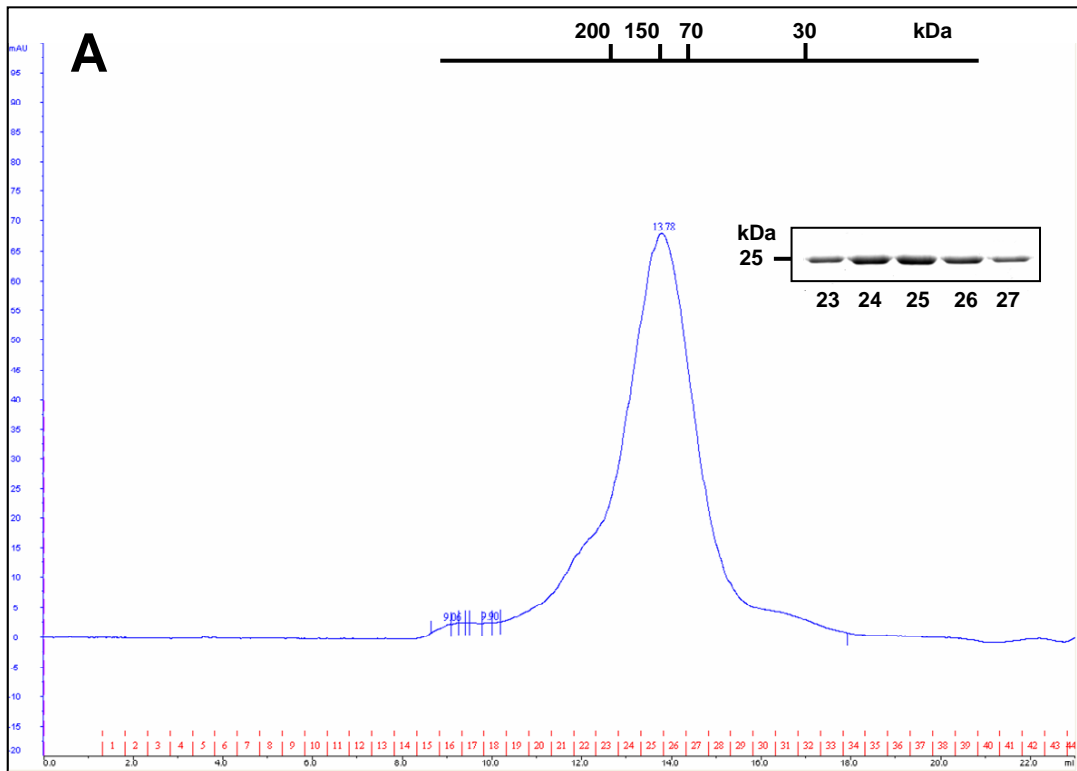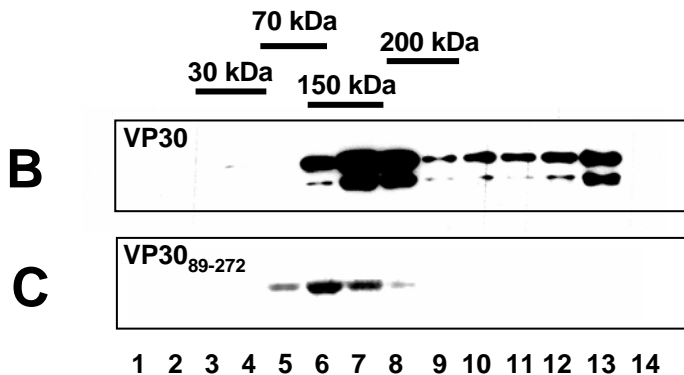

Supplement: pnas_0606730104_1.pdf [file pnas_0606730104_1.pdf]

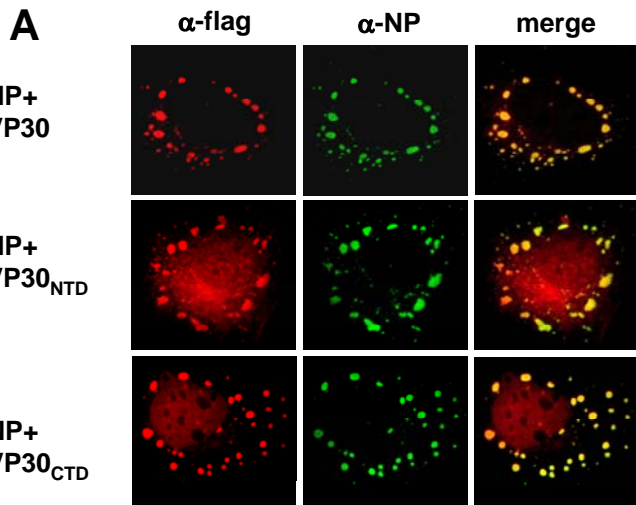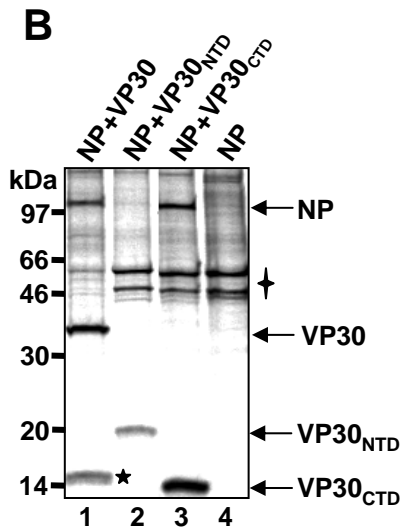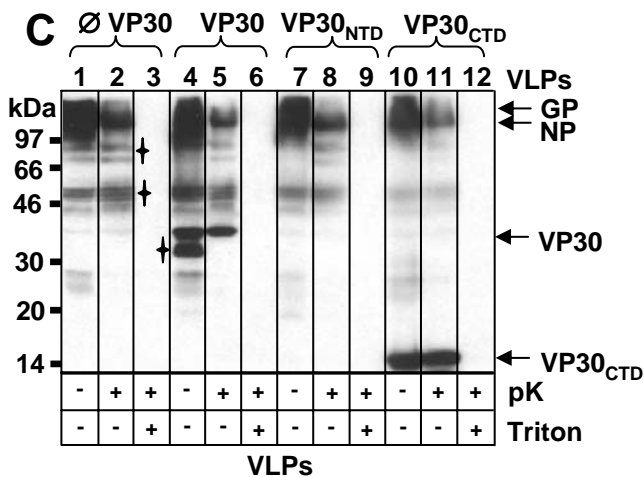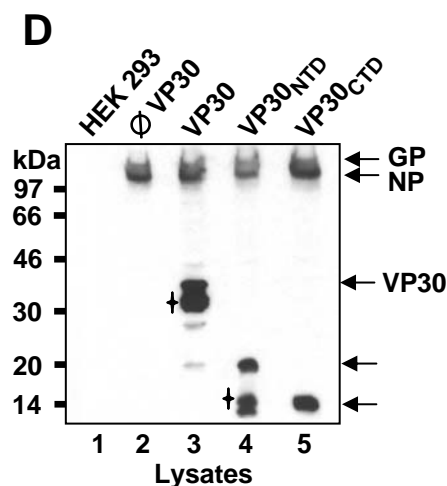

Supplement: pnas_0606730104_3.pdf [file pnas_0606730104_3.pdf]

**A**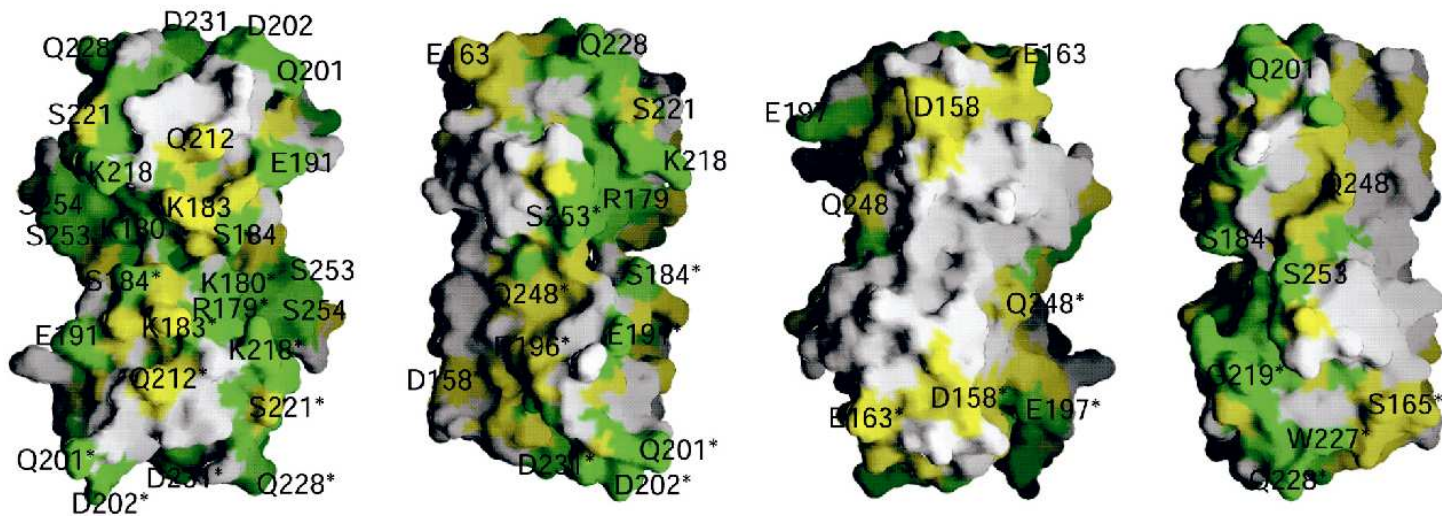**B**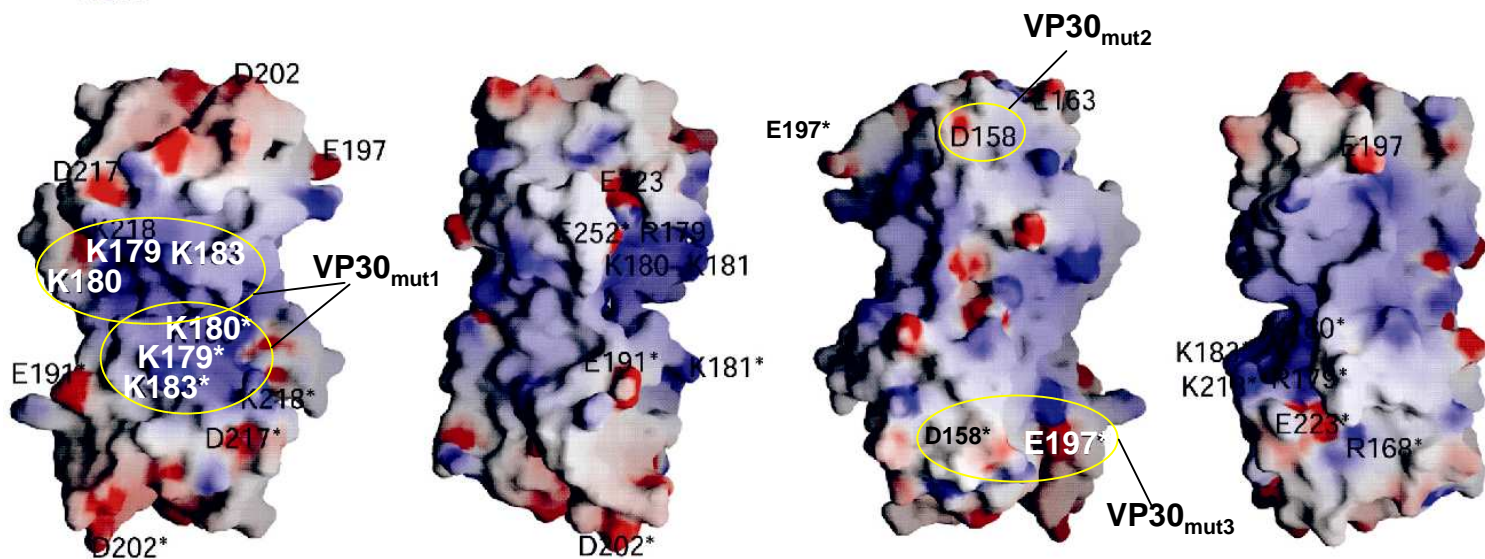

Supplement: pnas_0606730104_4.pdf [file pnas_0606730104_4.pdf]
